# Supplementary material for: Differential Regulation of Innate Lymphoid Cells in Human and Murine Oral Squamous Cell Carcinoma
Source: MDPI journal article supplement (doi:10.3390/ijms24021627), 2023-01-13
Supplement: s1 [file s1]

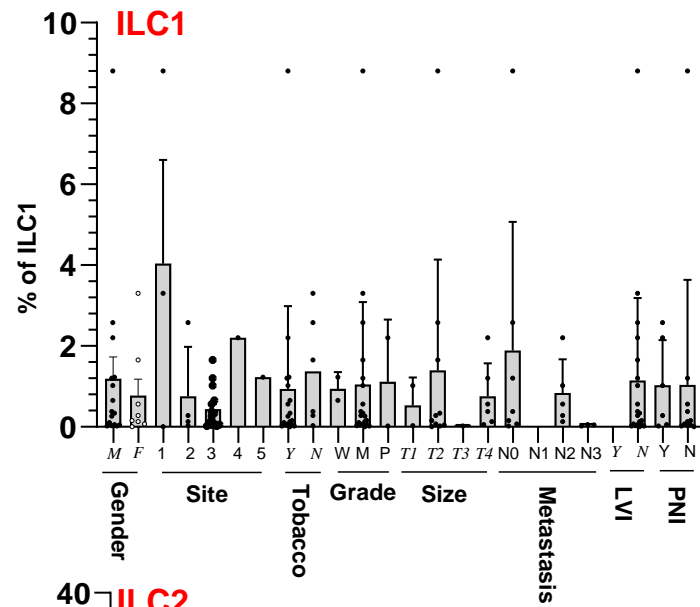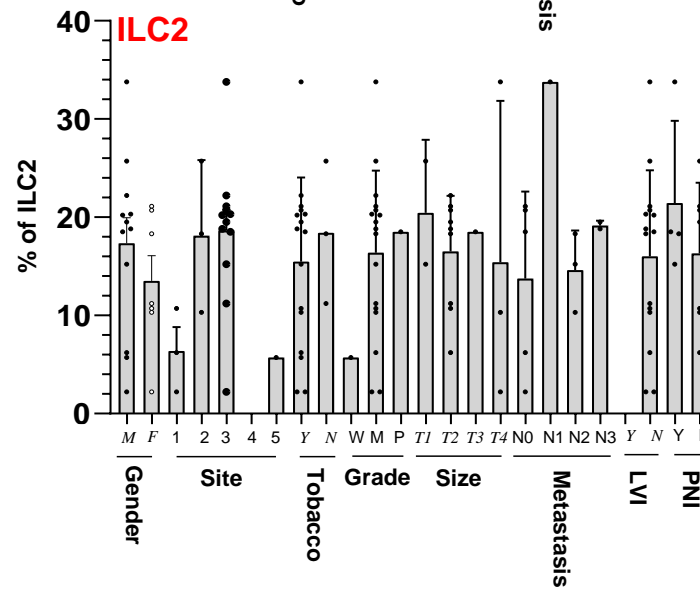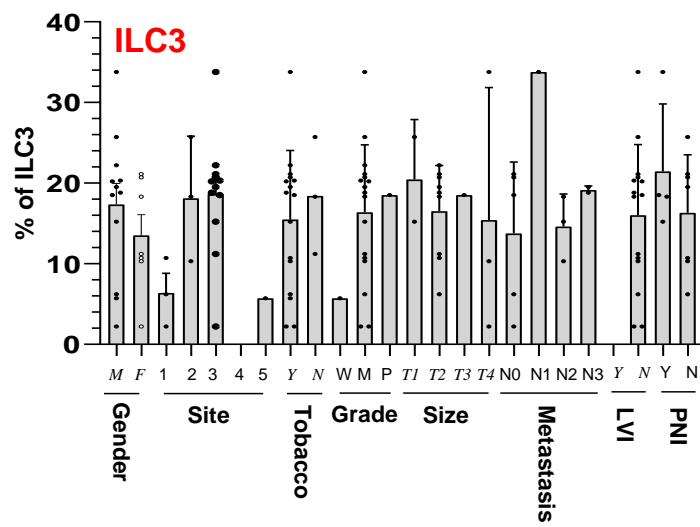

### **Supplementary Figure S1: ILCs infiltration segregated across various clinicopathological parameters in OSCC patients**

Percentages of ILC1, ILC2 and ILC3 are plotted separately against each of the category in various clinicopathological parameters in OSCC patients. X-axis denotes various clinicopathological parameters and Y-axis denotes percentages of ILCs.

M=male, F=female, 1=buccal mucosa, 2=lip, 3=tongue, 4=alveolus, 5=hard palate, Y=yes, N=no, W=well differentiated, M=moderately differentiated, P=poorly differentiate, T1=<2cm, T2=2-4cm, T3=>4cm, T4=>4cm+locally advanced, N0=no lymph node metastasis, N1=single ipsilateral lymph node involved at  $\leq 3$ cm, N2=single/multiple ipsilateral, bilateral/contralateral lymph node at 3-6cm, N3= metastasis in lymph node at >6cm in its greatest dimension.
